# Supplementary material
Source: publisher figshare collection journal article supplement (https://karger.figshare.com/ndownloader/files/37424704)
Supplement: Supplementary file 1 [file 37424704]

Supplemental table 1: Histological findings according to the number of small INVs

| Number of small INVs | SINVs Q1 | SINVs Q2 | SINVs Q3 | SINVs Q4 | P value |
| --- | --- | --- | --- | --- | --- |
|  | Q1≤165 | 166≤Q2≤254 | 255≤Q3≤374 | 375≤Q4 |  |
|  | n=29 | n=29 | n=29 | n=28 |  |
| Histological findings |  |  |  |  |  |
| Plaque area, mm2* | 191±87 | 223±120 | 249±91 | 285±132 | 0.012 |
| Plaque rupture | 10 (34.5%) | 16 (55.2%) | 12 (41.4%) | 10 (35.7%) | 0.36 |
| Thinnest fibrous cap, μm† | 91 (31-364) | 68 (30-219) | 83 (19-212) | 83 (28-315) | 0.79 |
| Density of neovessels* | 0.74±0.53 | 1.18±0.49 | 1.52±0.68 | 2.39±0.87 | <0.001 |
| Presence of intraplaque hemorrhage | 23 (79.3%) | 19 (65.5%) | 28 (96.6%) | 26 (92.9%) | 0.006 |
| Intraplaque hemorrhage area, mm2* | 3.4±3.1 | 4.9±5.7 | 7.7±5.8 | 15.3±21.7 | 0.001 |
| Cholesterol area, mm2† | 17.8 (2.1-33.5) | 21.6 (1.6-48.5) | 22.8 (9.1-60.2) | 16.7 (1.9-30.3) | 0.22 |
| Calcification area**,** mm2† | 3.7 (0-16.7) | 2.1 (0-8.8) | 1.6 (0-10.9) | 10.2 (0.8-27.1) | 0.067 |

SINVs, small intraplaque neovessels; LINVs, large intraplaque neovessels; Q, quartile; Vas-G0, vascular grade at 0 minutes; Vas-G10, vascular grade at 10 minutes. Data are expressed as mean ± standard deviation, median (1st and 3rd quartiles) or number (percentage) of subjects.

*: Analysis of variance; †: Kruskal-Wallis test.
